# Supplementary material for: Genotype–Phenotype Correlation in DFNB8/10 Families with TMPRSS3 Mutations
Source: PubMed Central journal article supplement — J Assoc Res Otolaryngol. 2011 Jul 23;12(6):753–66. doi: 10.1007/s10162-011-0282-3 (PMC3214237; doi:10.1007/s10162-011-0282-3), 2011-07-23
Supplement: 10162_2011_282_MOESM1_ESM.pdf [file 10162_2011_282_MOESM1_ESM.pdf]

Supplementary Table 1

| Fragment               | Oligonucleotides                                                 | Size (bp) | Annealing Temperature (°C) |        |
|------------------------|------------------------------------------------------------------|-----------|----------------------------|--------|
|                        | Primers for PCR and sequence analysis                            |           |                            | Enzyme |
| <i>TMPRSS3</i> exon 2  | Forward: accgatgaccaagatgcac<br>Reverse: tctaggaagtgcaggtgc      | 361       | 57                         |        |
| <i>TMPRSS3</i> exon 3  | Forward: tagagaatgtgcccttg<br>Reverse: tgctgggatgagagggg         | 365       | 57                         |        |
| <i>TMPRSS3</i> exon 4  | Forward: ggggacagttgttagtgttc<br>Reverse: aagggtcaggggtggcttc    | 249       | 57                         |        |
| <i>TMPRSS3</i> exon 5  | Forward: tgcctatgtctcagggttc<br>Reverse: cgtaaagcacccaatagtc     | 286       | 57                         |        |
| <i>TMPRSS3</i> exon 6  | Forward: acatccccatgtacaatcc<br>Reverse: catcacaatccagcaggtg     | 293       | 57                         |        |
| <i>TMPRSS3</i> exon 7  | Forward: gaccaatgtgagttcagcc<br>Reverse: agccacattgtccaggatac    | 674       | 57                         |        |
| <i>TMPRSS3</i> exon 8  | Forward: ccctgcagcactgtcttag<br>Reverse: cttctaccacccaaagcag     | 395       | 57                         |        |
| <i>TMPRSS3</i> exon 9  | Forward: ttcaggatacctgaggtcaatg<br>Reverse: caactgatgccaacaccaac | 400       | 57                         |        |
| <i>TMPRSS3</i> exon 10 | Forward: tcctcagaggcagaagcatag<br>Reverse: cccatgggaacatcacaatg  | 279       | 57                         |        |
| <i>TMPRSS3</i> exon 11 | Forward: tgttgcgacacaccagagag<br>Reverse: ctgagcaaatttctctccac   | 400       | 57                         |        |
| <i>TMPRSS3</i> exon 12 | Forward: gtccacagaaagcaatctcg<br>Reverse: agcacaagcgtctgacacc    | 380       | 57                         |        |
| <i>TMPRSS3</i> exon 13 | Forward: gtcatcatgtggacggatg<br>Reverse: agaccctggagagaaaacc     | 663       | 57                         |        |
|                        | Primers for PCR of products used for restriction analysis        |           |                            |        |
| <i>TMPRSS3</i> exon 4  | Forward: gaaacaggctgctgacagg<br>Reverse: cagctcgatacacttaaaggatg | 204       | 57                         | MaeIII |
| <i>TMPRSS3</i> exon 5  | Forward: tgcctatgtctcagggttc<br>Reverse: cgtaaagcacccaatagtc     | 286       | 57                         | MwoI   |
| <i>TMPRSS3</i> exon 7  | Forward: gtgtgacctcatcctcatgg<br>Reverse: agagtgatgggacatcatgg   | 483       | 57                         | PmlI   |
| <i>TMPRSS3</i> exon 9  | Forward: tttccctgttgacaatcc<br>Reverse: gcaaattctctgaaacaaag     | 186       | 57                         | MslI   |
| <i>TMPRSS3</i> exon 12 | Forward: gtccacagaaagcaatctcg<br>Reverse: agcacaagcgtctgacacc    | 380       | 57                         | HhaI   |

Reference sequence: NM\_024022 transmembrane protease, serine 3 isoform 1
