# Supplementary material for: Genotype–Phenotype Correlation in DFNB8/10 Families with TMPRSS3 Mutations
Source: PubMed Central journal article supplement — J Assoc Res Otolaryngol. 2011 Jul 23;12(6):753–66. doi: 10.1007/s10162-011-0282-3 (PMC3214237; doi:10.1007/s10162-011-0282-3), 2011-07-23
Supplement: 10162_2011_282_MOESM2_ESM.pdf [file 10162_2011_282_MOESM2_ESM.pdf]

Supplementary Figure 1

Family D

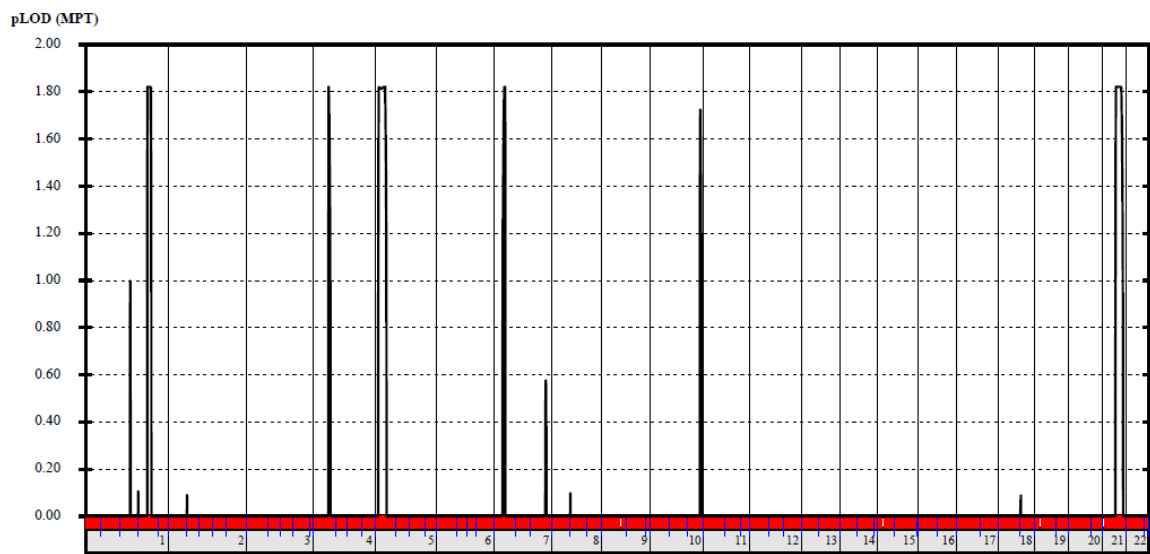

Family E

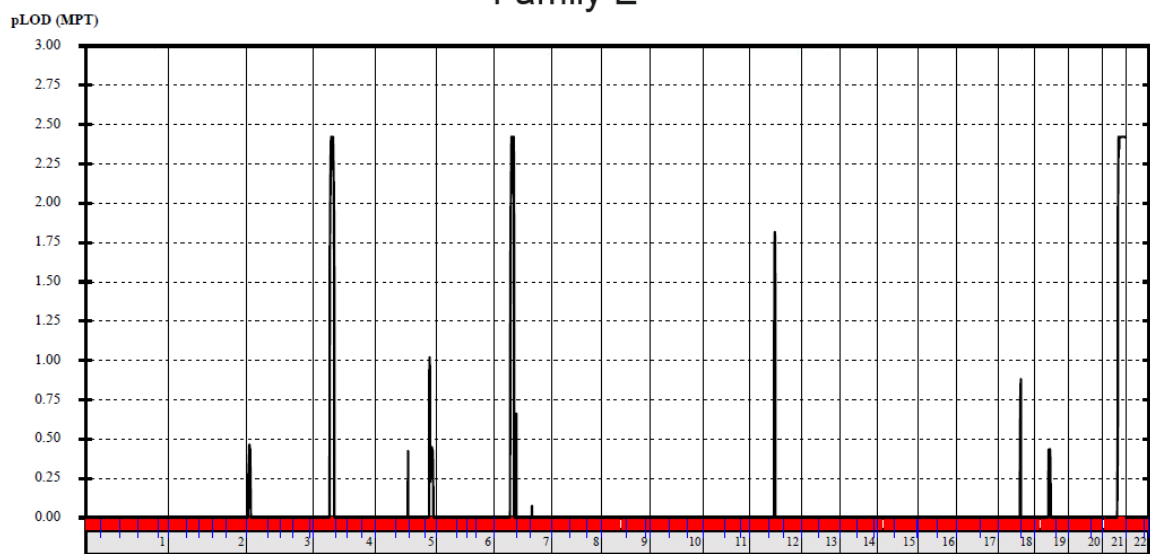

Result of linkage analysis for families D and E. Multipoint linkage analysis was performed with GeneHunter version 2.1r5 in the EasyLinkage software package. An autosomal recessive mode of inheritance with 95% penetrance and a disease allele frequency of 0.001 were used for linkage analysis.
